# Supplementary material for: Two Unrelated 8-Vinyl Reductases Ensure Production of Mature Chlorophylls in Acaryochloris marina
Source: PubMed Central journal article supplement (PMC4836224; doi:10.1128/jb.00925-15), 2016-04-14
Supplement: JB.00925-15_zjb999094021so1.pdf [file JB.00925-15_zjb999094021so1.pdf]

| Species                                     | GenBank Accession(s) | Assembly status |
|---------------------------------------------|----------------------|-----------------|
| <i>Acaryochloris</i> sp. CCME 5410          | AFEJ01000000         | Draft           |
| <i>Acaryochloris marina</i> MBIC11017       | CP000838-46          | Complete        |
| <i>Allochrochromatium vinosum</i> DSM 180   | CP001896-8           | Complete        |
| <i>Bradyrhizobium</i> sp. ORS278            | CU234118             | Complete        |
| <i>Chloracidobacterium thermophilum</i> B   | CP002514-5           | Complete        |
| <i>Chlorobaculum tepidum</i> TLS            | AE006470.1           | Complete        |
| <i>Chlorobium ferrooxidans</i> DSM 13031    | AASE01000000         | Draft           |
| <i>Chloroflexus aggregans</i> DSM 9485      | CP001337             | Complete        |
| <i>Chloroflexus aurantiacus</i> J-10-fl     | CP000909             | Complete        |
| <i>Chloroherpeton thalassium</i> ATCC 35110 | CP001100             | Complete        |
| <i>Cyanothece</i> sp. PCC 7822              | CP002198-204         | Complete        |
| <i>Fischerella thermalis</i> PCC 7521       | AJLL01000000         | Draft           |
| <i>Leptolyngbya</i> sp. Heron Island J      | AWN01000000          | Draft           |
| <i>Leptolyngbya</i> sp. JSC-1               | JMKF01000000         | Draft           |
| <i>Leptolyngbya</i> sp. PCC 7375            | ALVN01000000         | Draft           |
| <i>Methylobacterium</i> sp. GXF4            | AKFK01000000         | Draft           |
| <i>Pelodictyon phaeoclathratiforme</i> BU-1 | CP001110             | Complete        |
| <i>Prosthecochloris aestuarii</i> DSM 271   | CP001108-9           | Complete        |
| <i>Rhodobacter sphaeroides</i> 2.4.1        | AKVW01000000         | Complete        |
| <i>Rhodospseudomonas palustris</i> CGA009   | BX571963-4           | Complete        |
| <i>Synechococcus</i> sp. BL107              | DS022298             | Complete        |
| <i>Synechococcus</i> sp. CC9902             | CP000097             | Complete        |
| <i>Synechococcus</i> sp. PCC 7002           | CP000951-7           | Complete        |
| <i>Synechococcus</i> sp. WH 8102            | BX548020             | Complete        |
| <i>Synechocystis</i> sp. PCC 6803           | CP003265-9           | Complete        |
| <i>Thiorhodococcus drewsii</i> AZ1          | AFWT01000000         | Draft           |

**Table S2. List of genome sequences used in this study**
